# Supplementary material for: Responsiveness and Relationship Satisfaction in Couples Coping With Parkinson’s Disease: A Pilot Study
Source: PubMed Central journal article supplement (PMC9003747; doi:10.1177/0033294121998032), 2021-02-24
Supplement: sj-pdf-1-prx-10.1177_0033294121998032.pdf [file sj-pdf-1-prx-10.1177_0033294121998032.pdf]

**Table 1***Correlations Among all Key Variables and Demographics*

| Variable                 | 1 | 2    | 3    | 4     | 5      | 6      | 7      | 8     | 9     | 10     |
|--------------------------|---|------|------|-------|--------|--------|--------|-------|-------|--------|
| 1. CP CS                 | - | .224 | .013 | .100  | .432   | -.022  | -.473* | .068  | .055  | .364   |
| 2. PwPD CS               | - | -    | .209 | .216  | .654** | .555*  | -.045  | .387  | -.054 | .576** |
| 3. CP PPR                | - | -    | -    | .545* | .519*  | .368   | -.114  | -.011 | -.134 | .048   |
| 4. PwPD PPR              | - | -    | -    | -     | .416   | .647** | -.297  | -.127 | -.077 | .119   |
| 5. CP Rel. Sat           | - | -    | -    | -     | -      | .594** | -.230  | .086  | .019  | .312   |
| 6. PwPD Rel. Sat.        | - | -    | -    | -     | -      | -      | -.067  | .177  | .142  | .149   |
| 7. PD Non-Motor Symptoms | - | -    | -    | -     | -      | -      | -      | .067  | -.309 | .142   |
| 8. PD Motor Symptoms     | - | -    | -    | -     | -      | -      | -      | -     | .212  | .313   |
| 9. # Years with PD       | - | -    | -    | -     | -      | -      | -      | -     | -     | -.207  |
| 10. Relationship Length  | - | -    | -    | -     | -      | -      | -      | -     | -     | -      |

*Note.* “PwPD” = Partner with PD, “CP” = Care Partner, “PPR” = Perceived Partner Responsiveness, “CS” = Communal Strength, “Rel. Sat”. = Relationship Satisfaction. Relationship length is in years. \*  $p < .05$ , \*\*  $p < .01$ .

**Table 2**

*Effects of Communal Strength and Perceived Partner Responsiveness on Relationship Satisfaction*

|          | PwPD's<br><u>Relationship</u><br><u>Satisfaction</u> |          |              | CP's<br><u>Relationship</u><br><u>Satisfaction</u> |          |              |
|----------|------------------------------------------------------|----------|--------------|----------------------------------------------------|----------|--------------|
|          | <i>b</i> (SE)                                        | <i>t</i> | CI           | <i>b</i> (SE)                                      | <i>t</i> | CI           |
| PwPD CS  | 4.32(1.49)                                           | 25.24*   | 1.17, 7.48   | 2.97(.88)                                          | 3.37**   | 1.11, 4.83   |
| CP CS    | -1.39(1.84)                                          | -.756    | -5.30, 2.50  | 1.82(1.09)                                         | 1.67     | -.480, 4.12  |
| PwPD PPR | 9.78(3.39)                                           | 2.89*    | 2.63, 16.93  | 2.01(2.57)                                         | .783     | -3.41, 7.44  |
| CP PPR   | .455(4.67)                                           | .097     | -9.41, 10.32 | 6.07(3.55)                                         | 1.71     | -1.42, 13.56 |

*Note.* *b* represents unstandardized betas; SE represents standard error of the estimate. PwPD = partner with PD (N = 20), CP = care partners (N = 20). \*  $p < .05$ . \*\*  $p < .01$

**Figure 1**

*Actor and Partner Effects of Communal Strength on Relationship Satisfaction*

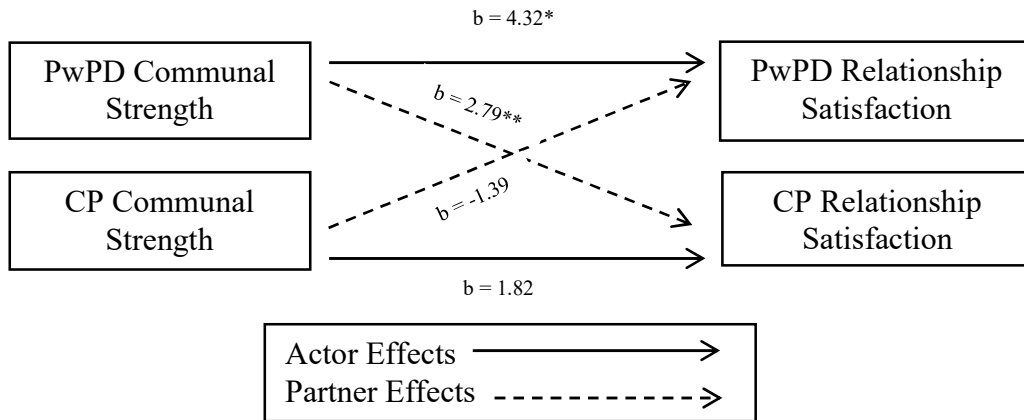

Note. \* =  $p < .05$ . PwPD = partner with PD, CP= care partner.

**Figure 2**

*Actor and Partner Effects of Perceived Partner Responsiveness on Relationship Satisfaction*

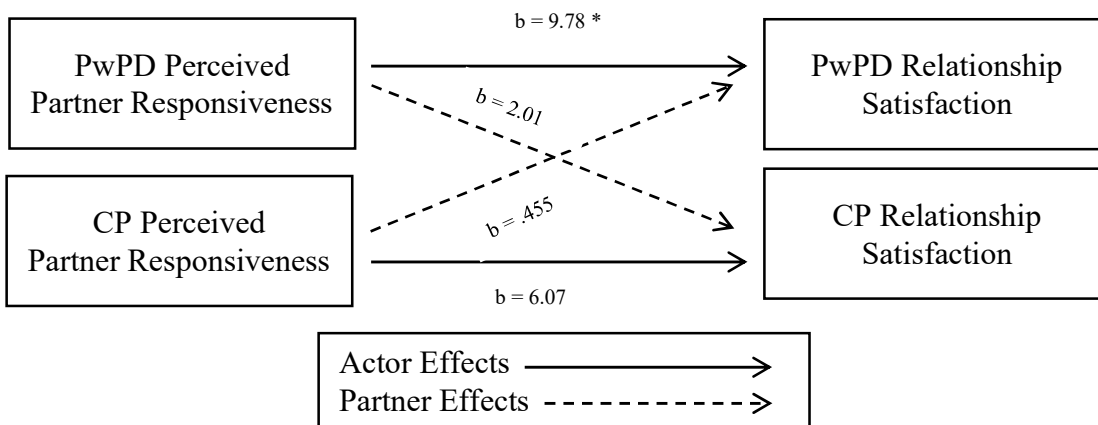

Note. \* =  $p < .05$ . PwPD = partner with PD, CP= care partner.
